# Supplementary material for: Food Environment After Implementation of a Healthy Checkout Policy
Source: PubMed Central journal article supplement (PMC11310826; doi:10.1001/jamanetworkopen.2024.21731), 2024-08-08

## Supplementary Online Content

Falbe J, Marinello S, Wolf EC, Solar S, Powell LM. Food environment after implementation of a healthy checkout policy. *JAMA Netw Open*. 2024;7(8):e2421731. doi:10.1001/jamanetworkopen.2024.21731

**eTable.** Store Sample in Berkeley and Comparison Cities

**eFigure.** Before-and-After Photos of Select Berkeley Checkouts Assessed in 2021 and 2022

This supplementary material has been provided by the authors to give readers additional information about their work.

**eTable.** Store Sample in Berkeley and Comparison Cities

| Store type              | Berkeley,<br>n (%) | Comparison cities, n (%) |           |            | Total<br>comparison | All, n (%) |
|-------------------------|--------------------|--------------------------|-----------|------------|---------------------|------------|
|                         |                    | Davis                    | Oakland   | Sacramento |                     |            |
| Chain dollar store      | 2 (9%)             | 2                        | 3         | 3          | 8 (11%)             | 11 (11%)   |
| Chain drug store        | 7 (30%)            | 3                        | 10        | 11         | 24 (32%)            | 33 (34%)   |
| Chain specialty food    | 3 (13%)            | 1                        | 3         | 4          | 8 (11%)             | 11 (11%)   |
| Chain supermarket       | 3 (13%)            | 6                        | 4         | 3          | 13 (17%)            | 15 (15%)   |
| Chain mass merchandiser | 2 (9%)             | 1                        | 1         | 4          | 6 (8%)              | 8 (8%)     |
| Independent supermarket | 2 (9%)             | 2                        | 2         | 3          | 7 (9%)              | 9 (9%)     |
| Independent grocery     | 4 (17%)            | 2                        | 3         | 4          | 9 (12%)             | 27 (28%)   |
| <b>Total</b>            | <b>23</b>          | <b>17</b>                | <b>26</b> | <b>32</b>  | <b>75</b>           | <b>98</b>  |

Note: Stratified random sampling was used to match stores in each comparison city to stores in Berkeley by chain and store type when possible. If a city had an insufficient number of matching stores by type, we sampled additional stores of that type from other comparison cities, and within the city with insufficient stores of that type, we sampled additional stores of other types. A total of 1 Berkeley and 3 comparison stores closed between pre- and post-implementation periods, reducing the sample from 102 to 98.

**eFigure.** Before-and-After Photos of Select Berkeley Checkouts Assessed in 2021 and 2022

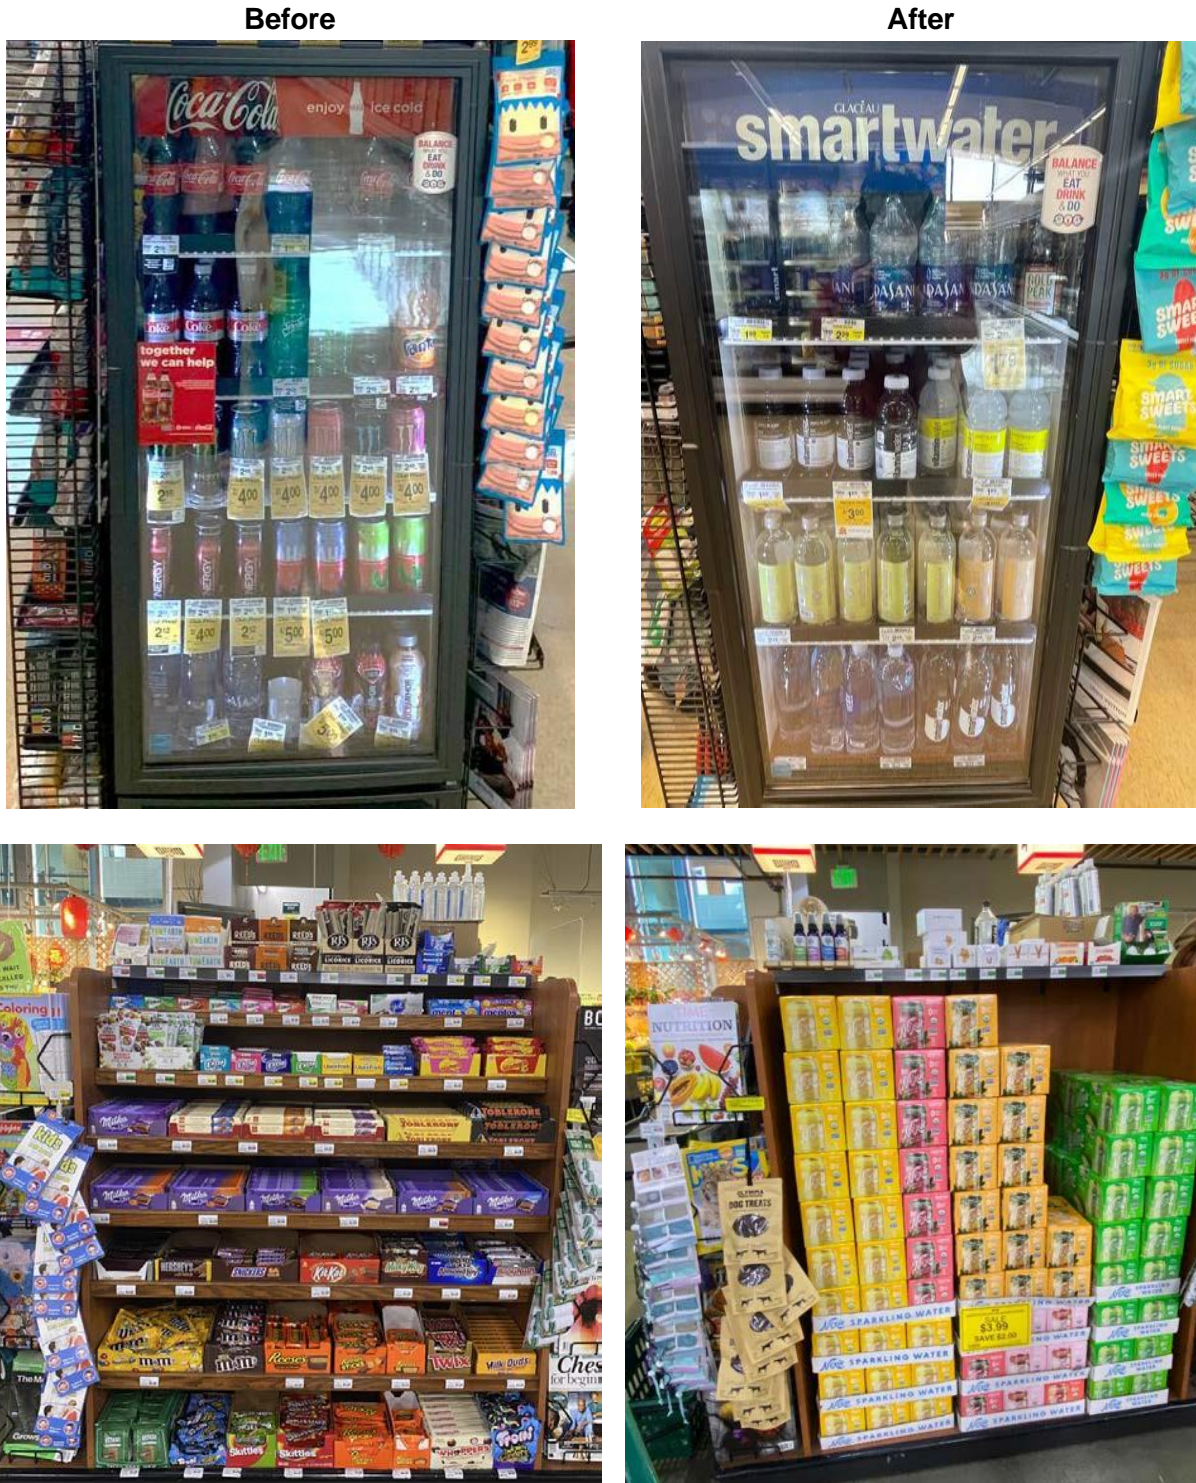



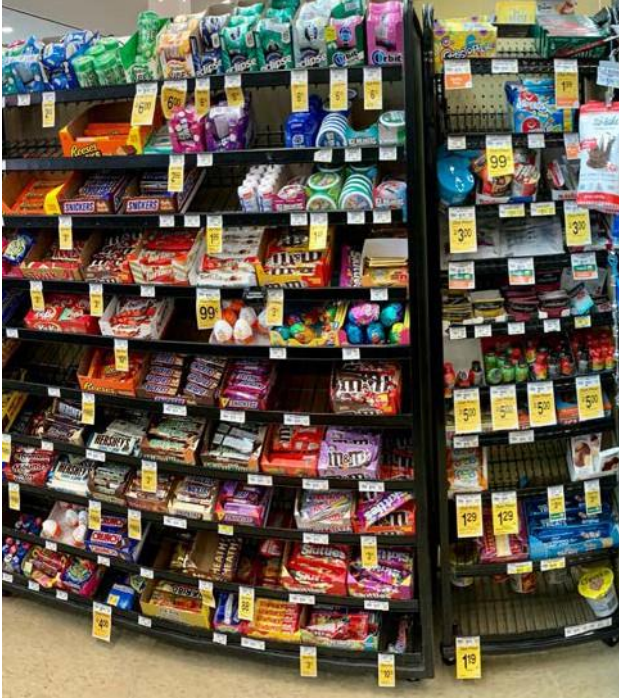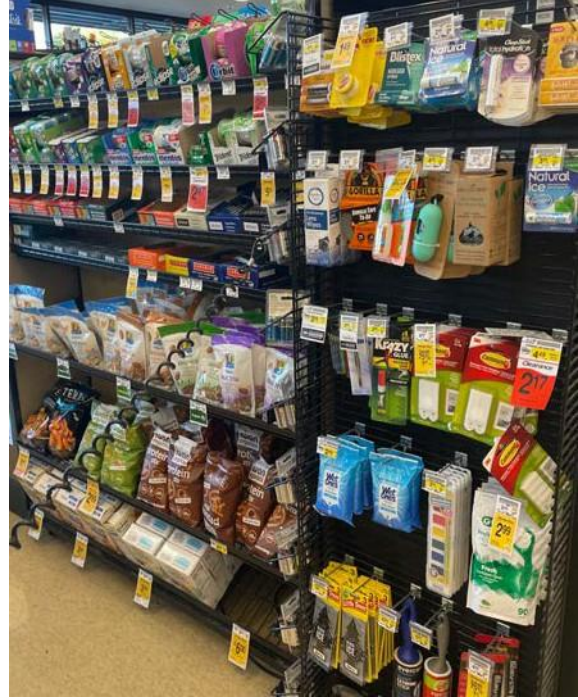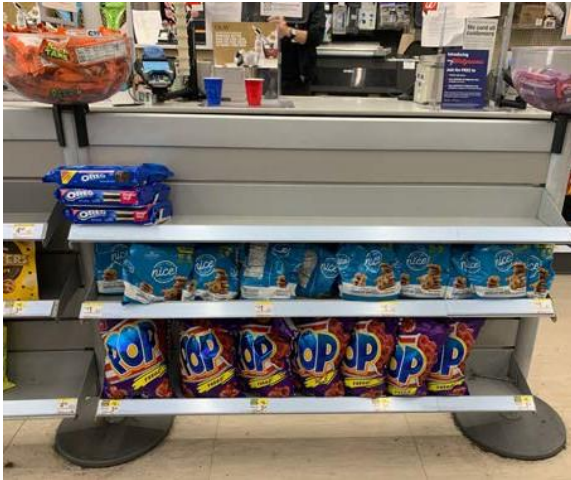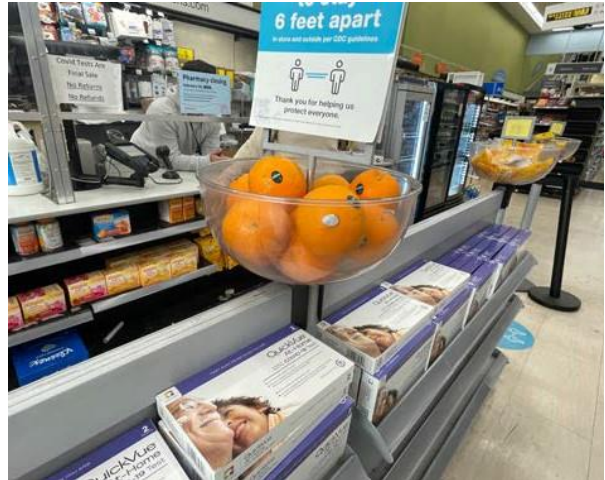

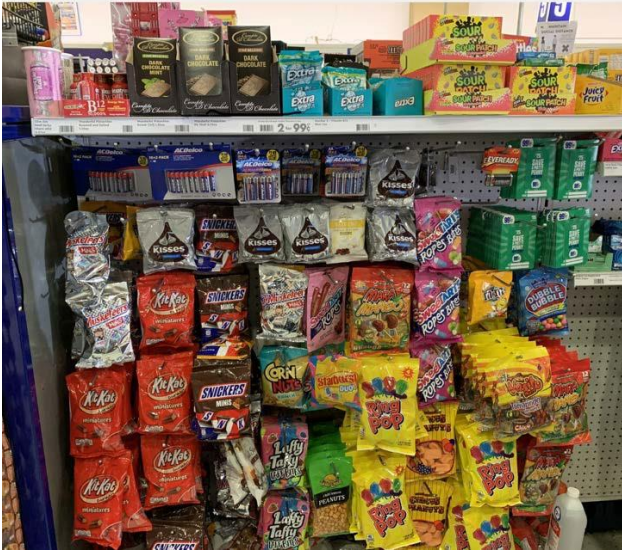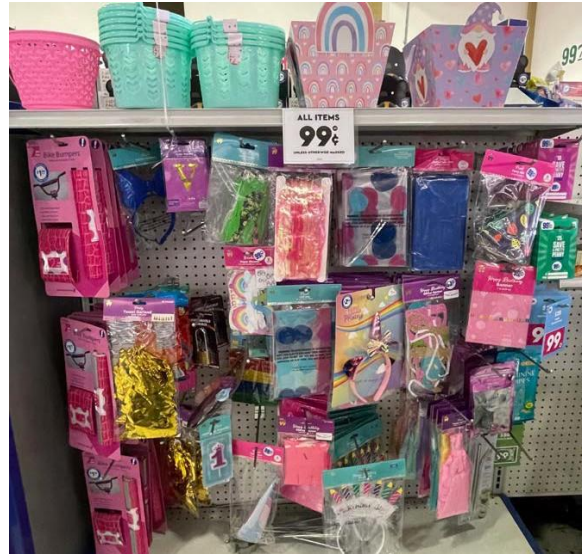

Supplement: jamanetwopen-e2421731-s001.pdf [file jamanetwopen-e2421731-s001.pdf]
